# Supplementary material
Source: publisher site journal article supplement (https://www.dovepress.com/get_supplementary_file.php?f=242939.xlsx)
Supplement: Supplementary file 1 [file get_supplementary_file.php]

## Sheet: Table S1
Table S1. Primers and siRNAs sequences used in this work
Primer Sequences
Gene	Forward Primer	Reverse Primer
KIF14	5′-ACGATCACAGAATAACAAGTCGAA-3′	5′-ATCTCCATTAGTGTGAGCCGTAG-3′
NUSAP1	5′-ACAAATTAAAGACCATCACGGG-3′	5′-TCATAGTTGAGGGGACGAGACA-3′
MCM6	5′-AAGACCTGCCTACCAGACACAA- 3′	5′-TGACAGTCCAAGCACAGAAAAGT- 3′
TRIM24	5′-CACCTAGTGCCTCCAGCGTT- 3′	5′-ACCACTGGGACTTTGTGTGTAGA- 3′
MASTL	5′-AACCCTGCTGTACAAGAGAGTAACC- 3′	5′-CTGGATGGTTCTGAGTTATTGGAT- 3′
RAB14	5′-TGGGAGTAGGAAAATCTTGCTTG- 3′	5′-GCTCCTCTGTAGTAGCTCCGTGT- 3′
SMC4	5′-CAGAATATGATGCTGTGGCTGA- 3′	5′-TCTTGATTGCTACTTGGGCTTT- 3′
ACTIN	5’-CACCATTGGCAATGAGCGGTTC-3’	5’-AGGTCTTTGCGGATGTCCACGT-3’
U6	5′-CTCGCTTCGGCAGCACA- 3′	5′-AACGCTTCACGAATTTGCGT- 3′
siRNA sequences
Gene	Antisense (5'-3')
si-h-KIF14_001	GGAACACCCTGACACGAAA
si-h-KIF14_002	CCCTAATCCTGTAGGTAGA
si-h-KIF14_003	GGAAGAGATACTCCTATAA
mimic/inhibitor sequences
hsa-miR-154-5p mimic	UAGGUUAUCCGUGUUGCCUUCG
	CGAAGGCAACACGGAUAACCUA
mimic nc	UUUGUACUACACAAAAGUACUG
	CAGUACUUUUGUGUAGUACAAA
hsa-miR-154-5p inhibitor	CGAAGGCAACACGGAUAACCUA
Inhibitor nc	CAGUACUUUUGUGUAGUACAAA

## Sheet: Table S2
Table S2. Incidence of xenograft tumor and lymph node metastasis (n=6 per group)
Groups	Total number of animals,n	Number of metastasis,n	Metastasis rate (%)
mimic NC	6	5	83.3
miR-154-5p mimic	6	1	16.7
The differences between the two groups were statistically significant
